# Supplementary material
Source: publisher site journal article supplement (https://www.dovepress.com/article/491222)
Supplement: Supplementary file 1 [file get_supplementary_file.php]

**Supplementary figures**


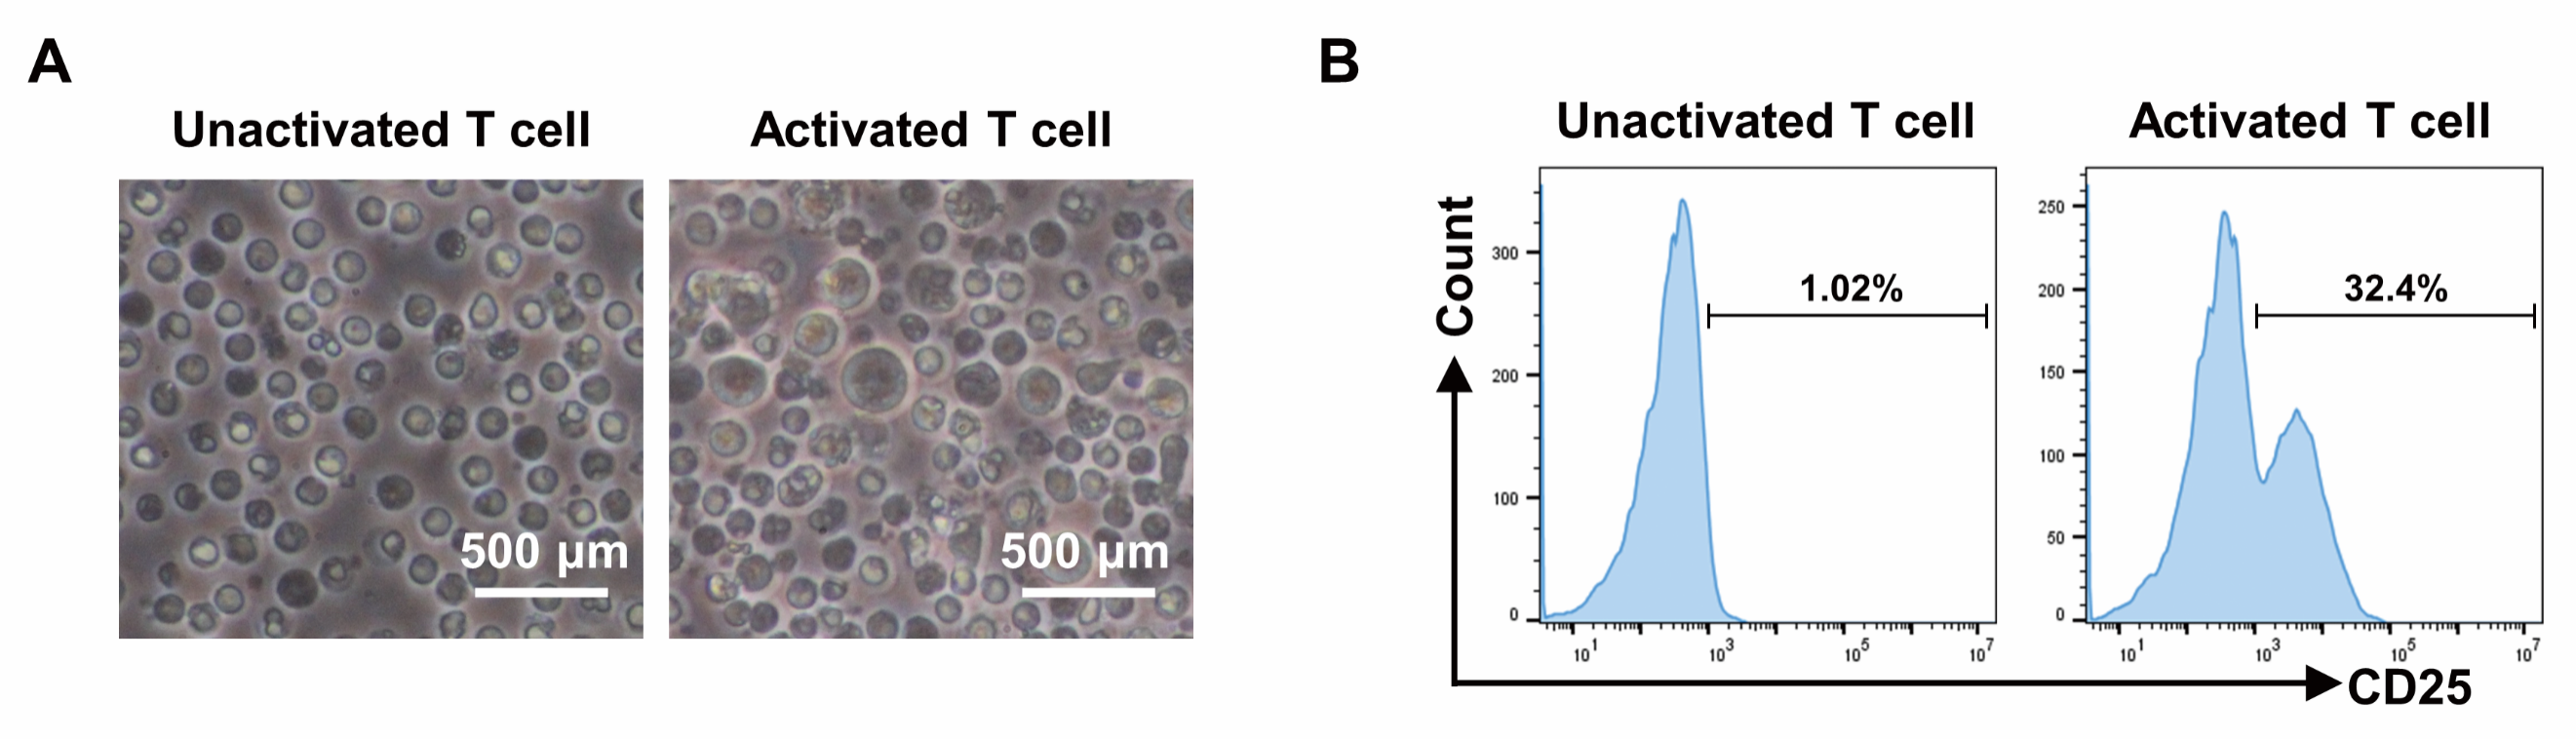


**Figure S1. Characterization of T cells before and after activation.** (**A**) Representative images of T cells before and after activation (scale bar = 500 μm). (**B**) Flow cytometry analysis of CD25 expression in T cells before and after activation.


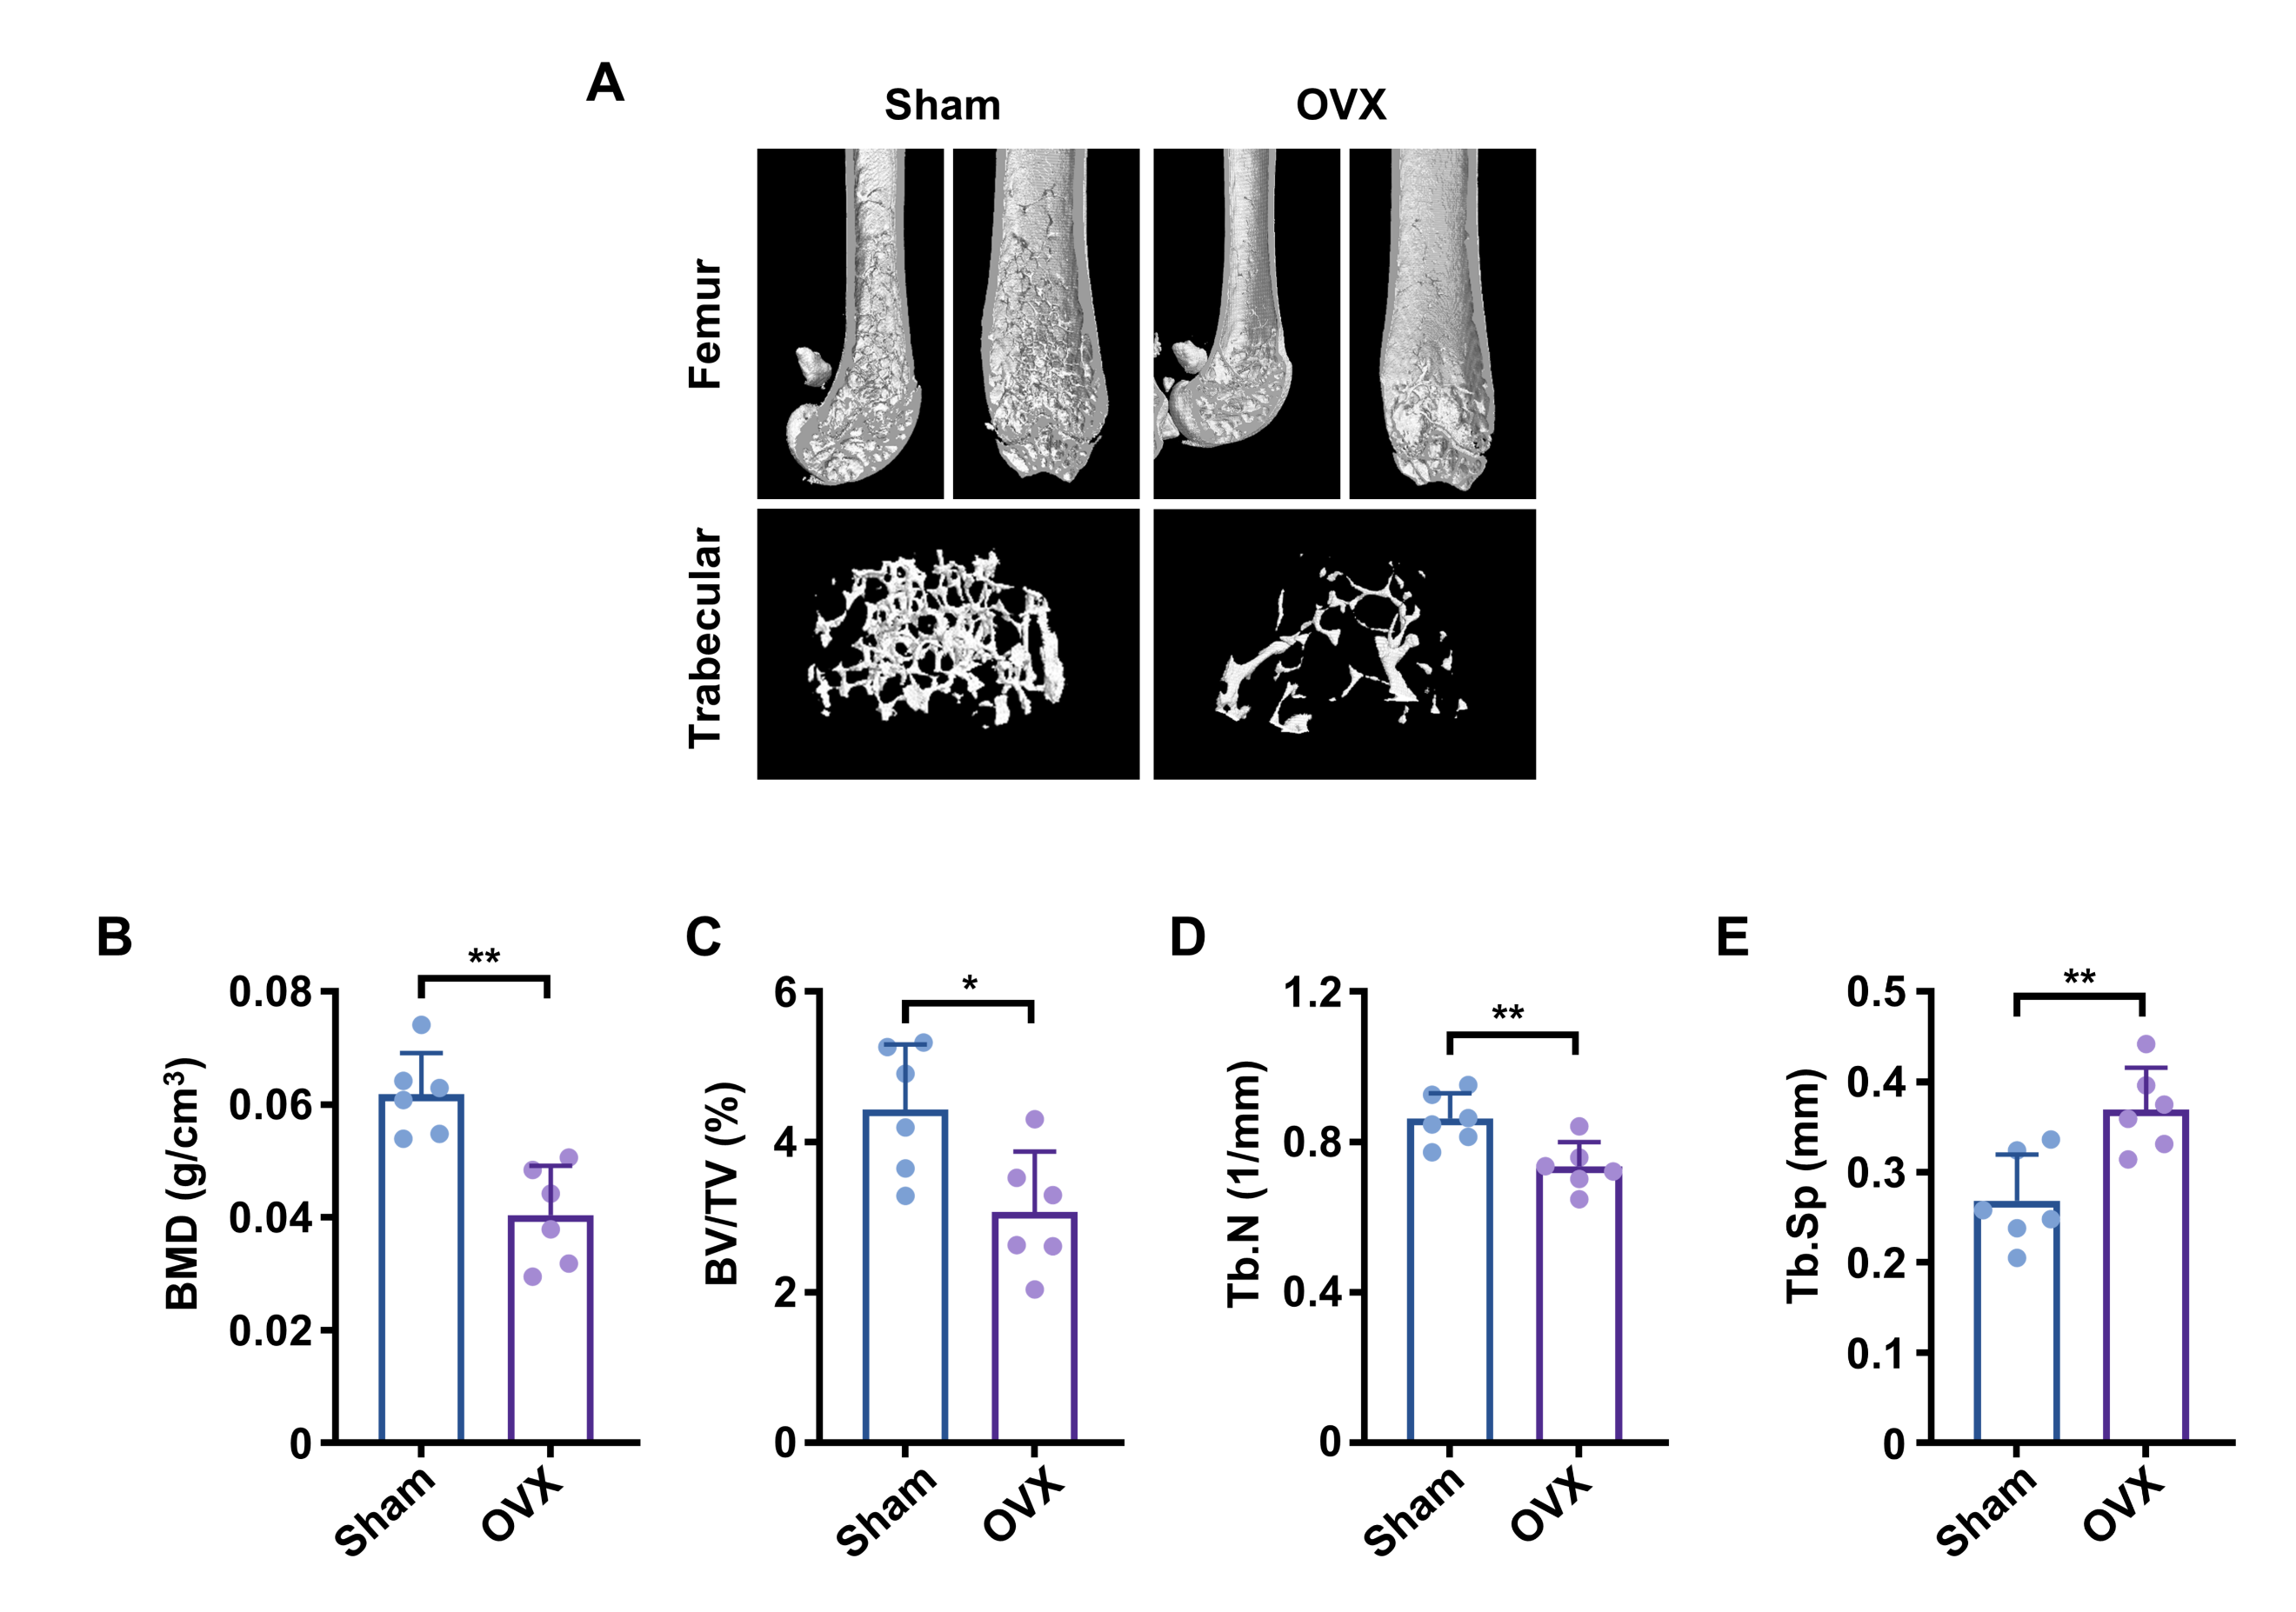


**Figure S2. Ovariectomy (OVX) leads to decreased bone mass in C57BL/6 mice.** Eight-week-old female C57BL/6 mice were subjected to either a sham operation (Sham) or bilateral ovariectomized (OVX) (**A**). Micro-CT analyses of trabecular bone mass in the femurs. (**B-E**) Quantitative analyses of BMD (**B**), BV/TV (**C**), Tb. N (**D**) and Tb. Sp (**E**) (N = 6). Data are presented as mean ± SD; *P< 0.05; **P< 0.01 by unpaired Student’s *t* test.


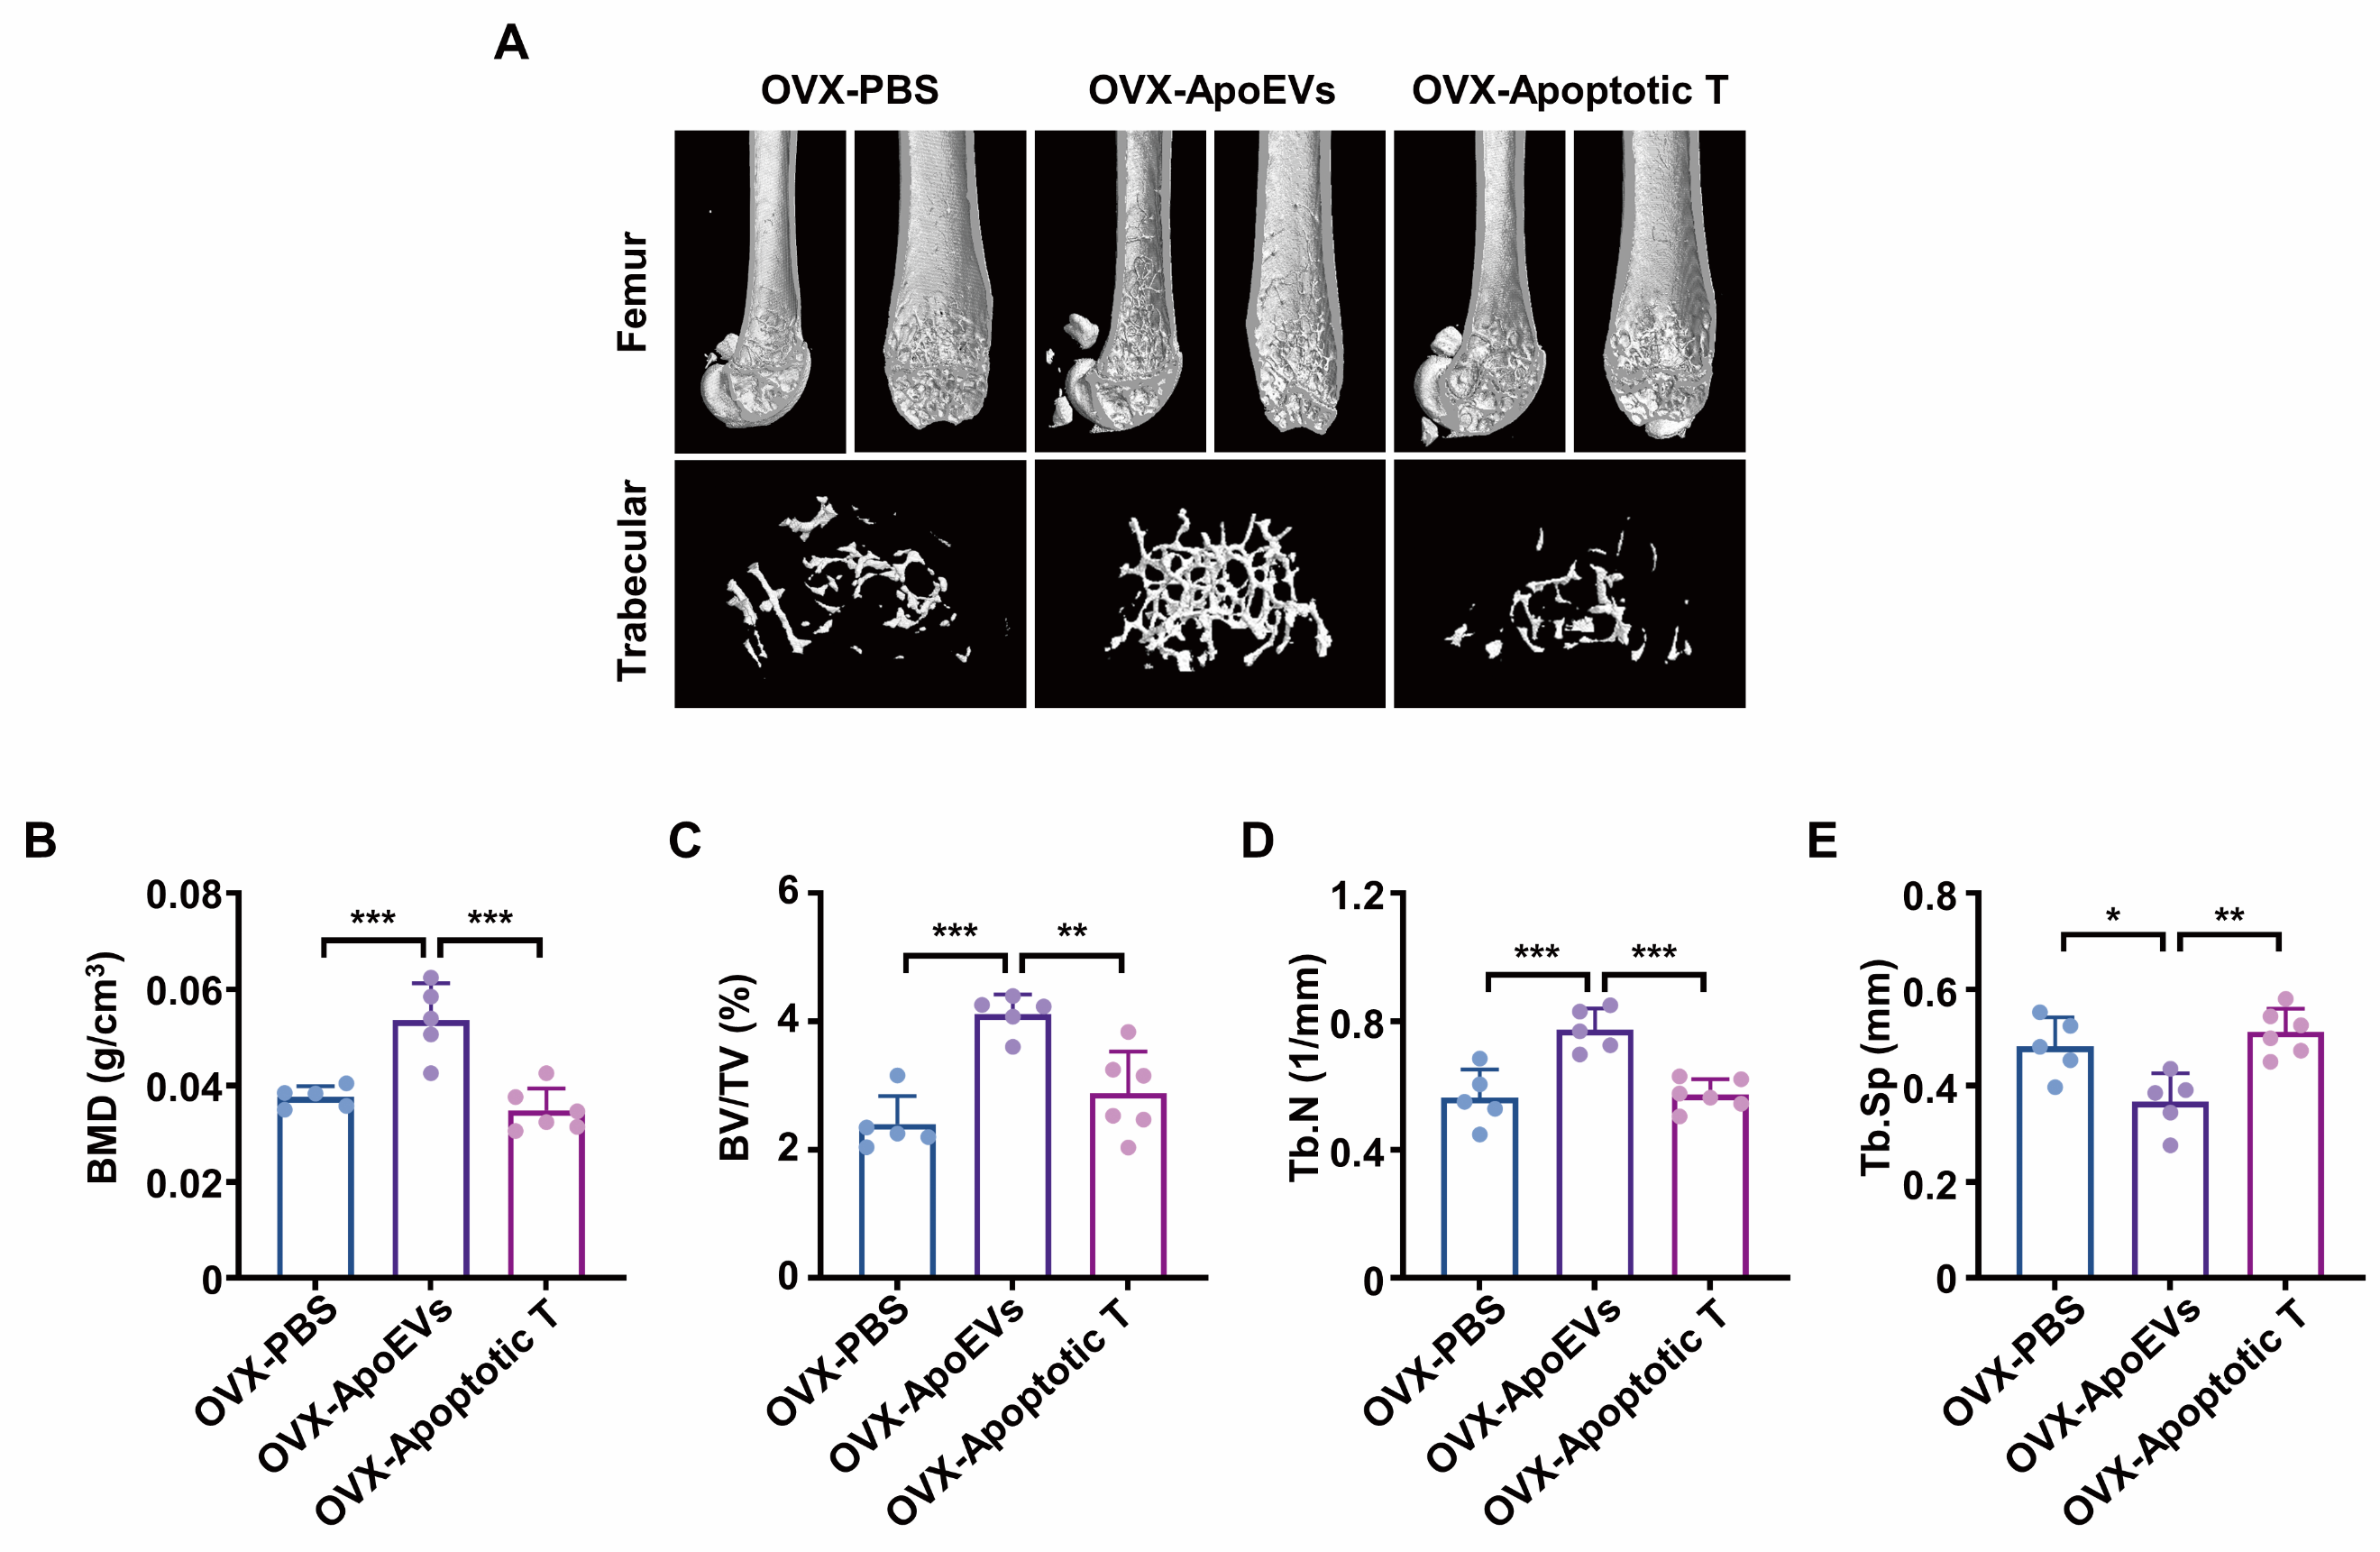


**Figure S3. Apoptotic T cells (ApoEVs-free) failed to mitigate bone loss in OVX mice.** (**A**) OVX mice were treated with PBS, ApoEVs or apoptotic T cells (ApoEVs-free). Micro-CT analyses of trabecular bone mass in the femurs. (**B-E**) Quantitative analyses of BMD (**B**), BV/TV (**C**), Tb. N (**D**) and Tb. Sp (**E**) (N = 5-6). Data are presented as mean ± SD; *P< 0.05; **P< 0.01; ***P< 0.001 by one-way ANOVA with Tukey’s post hoc test.


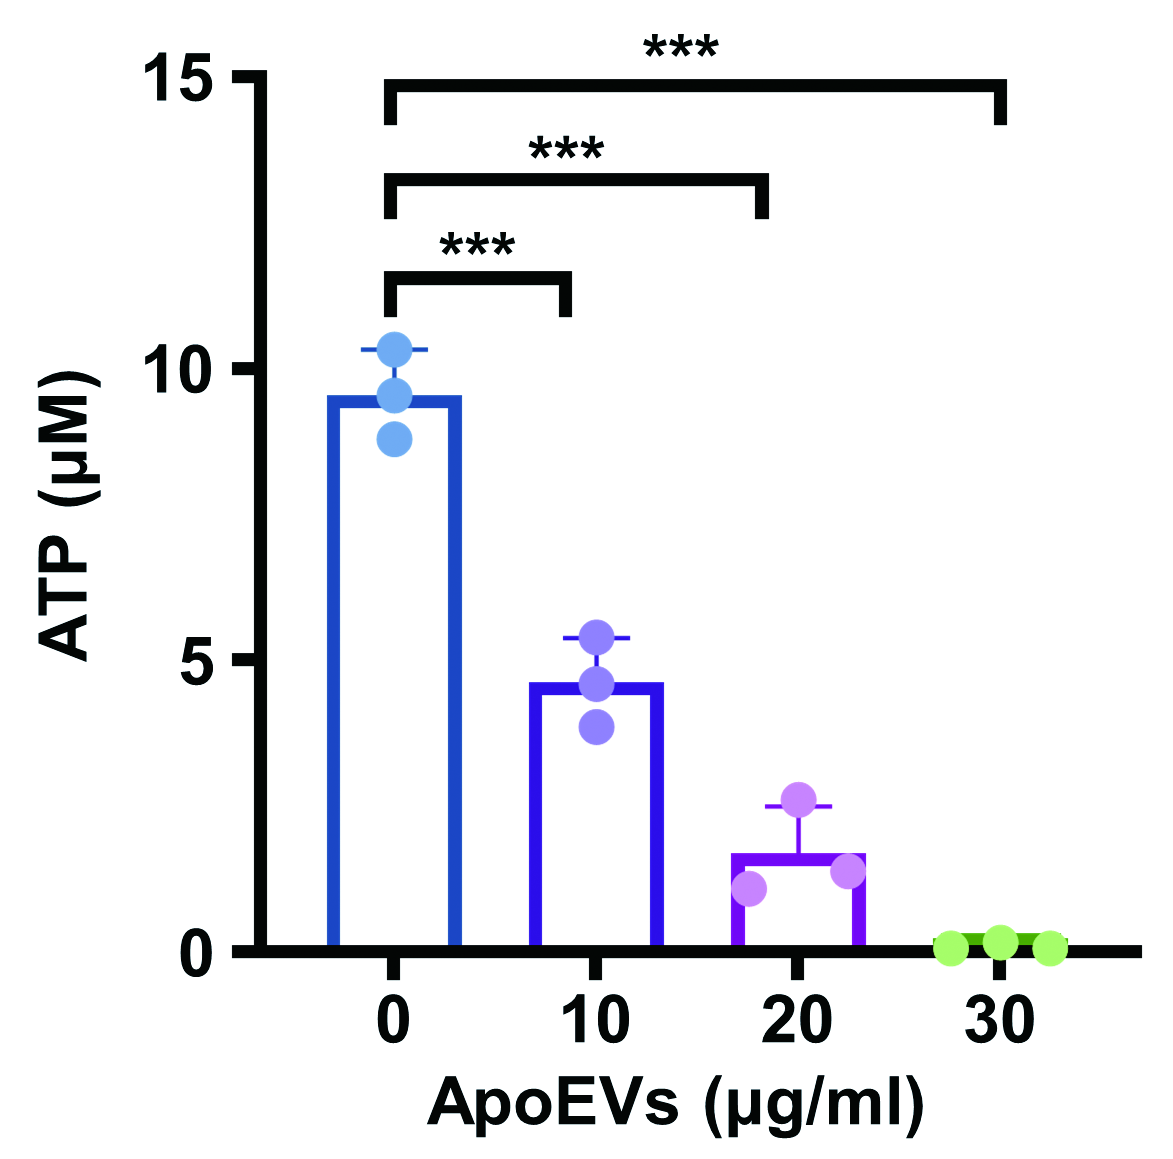


**Figure S4. T cell-derived ApoEVs hydrolyze ATP dose-dependently.** The activity of T cell derived-ApoEVs to hydrolyze ATP was measured *in vitro* (n = 3). Data are presented as mean ± SD; ***P< 0.001 by one-way ANOVA with Tukey’s post hoc test.
